# Supplementary material for: Additional carbon inputs to reach a 4 per 1000 objective in Europe: feasibility and projected impacts of climate change based on Century simulations of long-term arable experiments
Source: Copernicus journal article supplement (doi:10.5194/bg-2020-489), 2021-01-12

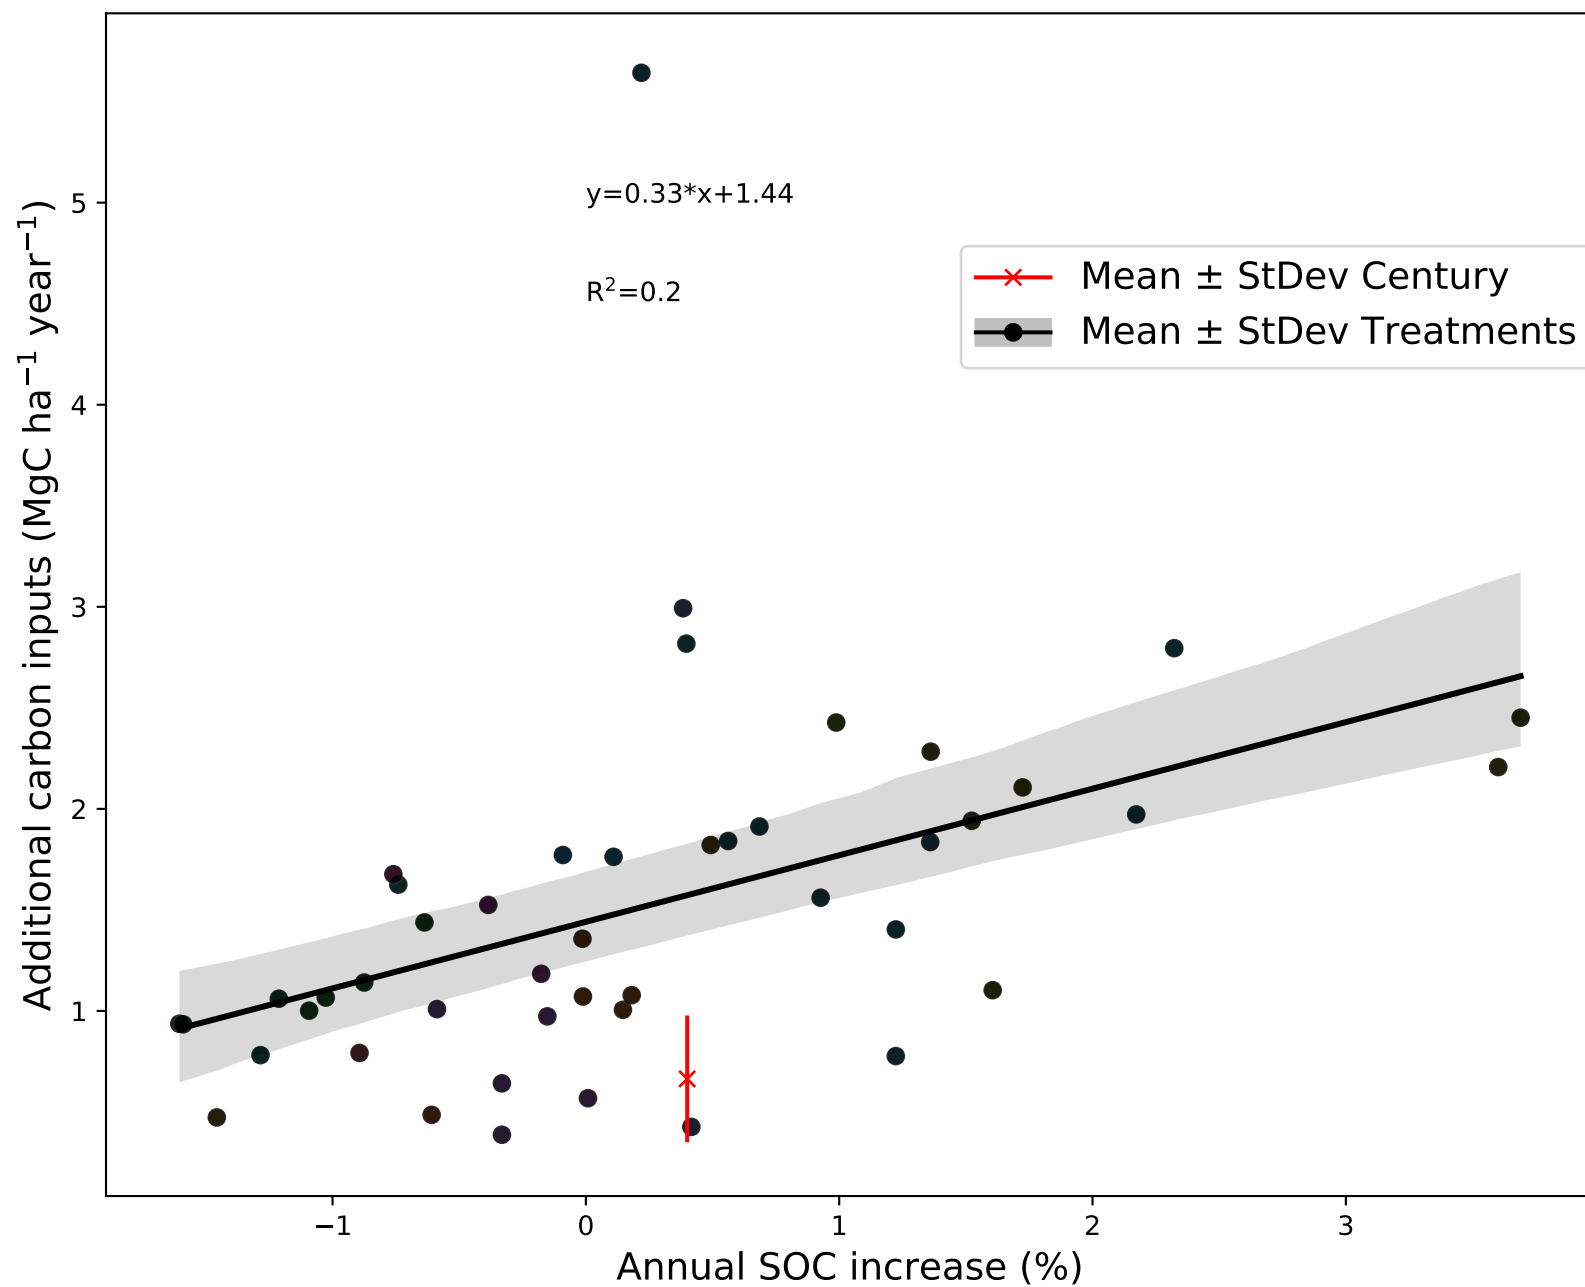

Supplement: Supplementary file [file bg-2020-489-AC1-supplement.zip]
